# Supplementary material for: Cold environment regulates ischemic stroke through modulation of gut microbiota
Source: Research Square preprint supplement (doi:10.21203/rs.3.rs-5827231/v1), 2025-05-06
Supplement: Supplementary file 1 [file 05ce2d3f8e0f48a142a4464a.docx]

**Supplementary material**

1. **The inclusion criteria for the HR group were as follows:**
2. presence of high-risk factors for cerebrovascular disease (such as hypertension, diabetes, atrial fibrillation, carotid plaque, etc.) but no recent evidence of cerebral infarction on imaging. (2) Age between 50 and 80 years, regardless of sex. (3) No significant changes in residence or dietary habits in the past month. (4) Complete medical and follow-up records. (5) Patients or their families provided signed informed consent. Participants with no history of cardiovascular or cerebrovascular disease and an ESRS score lower than 3 were classified into the low-risk (LR) group. The remaining criteria were the same as those for the HR group. The exclusion criteria for participants were as follows: (1) use of antibiotics, probiotics, or steroids for more than two weeks in the past three months. (2) The use of drugs affecting gastrointestinal motility, laxatives, or other drugs affecting gastrointestinal motility for more than two weeks in the past three months. (3) Recent history of international travel. (4) Patients with a history of acute or chronic enteritis, irritable bowel syndrome, inflammatory bowel disease, or previous gastrointestinal surgery. (5) Patients who had a history of severe alcohol or drug abuse in the past two years. (6) Impaired overall health conditions (such as congestive heart failure, respiratory failure, and severe liver or kidney dysfunction). Significant changes in dietary habits during the study period were assessed via the Food Frequency Questionnaire (FFQ). All patients were collectively diagnosed by a consensus group composed of three senior neurologists.
3. **Detection Methods for Related Biological Indicators**

Specifically, the concentrations of ICAM-3, Lp-PLA2, TNFR2, and VEGF were measured using enzyme-linked immunosorbent assay (Ruixin Biological,Wuhan, China), fecal lipopolysaccharides (J&L Biological, Shanghai, China). Fecal lipopolysaccharides (LPS, Cat. NO. JL20691, J&L Biological, Shanghai, China)The operating steps are as follows:

1. Prepare the working solutions of various kit components according to the instructions provided in the manual; 2) Remove the required strips from the aluminum foil bag. Seal the remaining strips in a resealable bag and store them back in the refrigerator; 3) Set up wells for standards, zero control, blank, and samples: add 50 μL of standards with different concentrations to the standard wells, 50 μL of sample diluent to the zero control well, leave the blank well empty, and add 50 μL of test sample to each sample well; 4) Except for the blank well, add 100 μL of horseradish peroxidase (HRP)-labeled detection antibody to the standard, zero, and sample wells;
2. Cover the plate with a sealing film and incubate it at 37°C in a water bath or incubator, protected from light, for 60 minutes; 6) Remove the sealing film, discard the liquid, and pat the plate dry on absorbent paper. Fill each well with washing buffer, let it sit for 20 seconds, discard the liquid, and pat dry again. Repeat this washing step 5 times. If using an automatic plate washer, follow the device's standard procedure and include a 30-second soak step to improve assay accuracy. After washing, make sure the plate is fully dried on clean, lint-free paper before adding substrate; 7) Mix Substrate A and Substrate B at a 1:1 volume ratio thoroughly, then add 100 μL of the mixed substrate solution to each well. Cover the plate with sealing film and incubate it at 37°C in a water bath or incubator, protected from light, for 15 minutes; 8) Add 50 μL of stop solution to each well, and measure the optical density (OD) at 450 nm using a microplate reader.

For the SII index, its value was calculated based on the results of the complete blood count (SII = neutrophil count × platelet count / lymphocyte count). The ADP-induced platelet aggregation rate is a routine clinical test item, performed by the hospital's laboratory at the time of subject enrollment, and the raw data were exported through the hospital's information system (HIS). Since this index is based on a standardized clinical procedure and demonstrates good stability and comparability, no additional laboratory retesting was conducted for this indicator.

1. **Fecal Microbiota Transplantation**

In this part of the study, we selected fecal samples from HR group participants who met the following criteria to minimize potential confounding factors: 1) aged over 75 years, 2) had a history of both hypertension and diabetes, and 3) did not have a history of heart disease. The fecal samples were weighed, mixed, and then ground through a 70 µm filter. The fecal suspension was mixed at a 1:5 ratio with a solution of 30% glycerol (prepared in PBS)+2.5% L-cysteine and BHI medium (Sangon, Shanghai, China). The mice were divided into two specific groups: the CEHR group, in which the mice were transplanted with fecal samples from HR group participants after a cold wave (January 2023), and the NTHR group, in which the mice were transplanted with fecal samples from HR group participants during the baseline period (September 2022).

Seven days before fecal transplantation, the mice received a daily intraperitoneal injection of 200 µL of an antibiotic mixture (ampicillin: 1 g/L, vancomycin: 0.5 g/L, metronidazole: 1 g/L, and neomycin: 1 g/L; Sangon, Shanghai, China) for seven consecutive days to promote gut microbiota remodeling. After antibiotic treatment, the mice were gavaged daily with the fecal suspension for seven consecutive days, with a single gavage volume of approximately 500 µL per day18.

sTable1 Changes in Measured Indicators During Follow-up

| Group | 2022.09 | 2022.11 | 2023.01 |  |
| --- | --- | --- | --- | --- |
| HR |  |  |  | *P* |
| ADP-induced PARs (%) | 42.99 ± 17.77 | 47.36 ± 16.24 | 58.11 ± 17.97# | 0.03 |
| ICAM-3(ng/mL) | 0.59 (0.07, 1.07) | 0.38 (0.08, 1.5) | 1.11 (0.14, 2.9)#+ | 0.01 |
| Lp-PLA2 (ng/mL) | 180.68 ± 26.49 | 185.93 ± 19.36 | 188.03 ± 19.52 | 0.63 |
| TNFR2 (ng/mL) | 2.29 ± 0.32 | 2.26 ± 0.28 | 2.34 ± 0.38 | 0.8 |
| VEGF (pg/mL) | 286.25 ± 27.9 | 290.18 ± 30.26 | 314.58 ± 31.81# | 0.02 |
| SII | 1334.21(743.66, 1477.82) | 1228.99 (831.82, 1568.25) | 1362.4 ± 447.7 | 0.31 |
| LR |  |  |  |  |
| ADP-induced PARs (%) | 36.34 ± 16.92 | 39.45± 18.08 | 40.77 ± 16.86 | 0.77 |
| ICAM-3 (ng/mL) | 0.37 (0.06, 1.52) | 0.87 ± 0.64 | 1.02 ± 0.71 | 0.68 |
| Lp-PLA2 (ng/mL) | 164.41 ± 32.55 | 172.57 ± 23.33 | 167.63 ± 38.03 | 0.88 |
| TNFR2 (ng/mL) | 2.35 (1.94, 2.91) | 2.26 ± 0.36 | 2.25 ± 0.34 | 0.86 |
| VEGF (pg/mL) | 276.73 ± 49.21 | 281.15 ± 50.85 | 280.33 ± 40.88 | 0.96 |
| SII | 875 (632.13, 996.09) | 940.44 ± 362.91 | 978.96 ± 349.2 | 0.79 |

**Changes in Measured Indicators During Follow-up in HR and LR Groups.**
*September 2022 vs November 2022 *P* < 0.05;
#September 2022 vs January 2023 *P* < 0.05;
+November 2022 vs January 2023 *P* < 0.05.


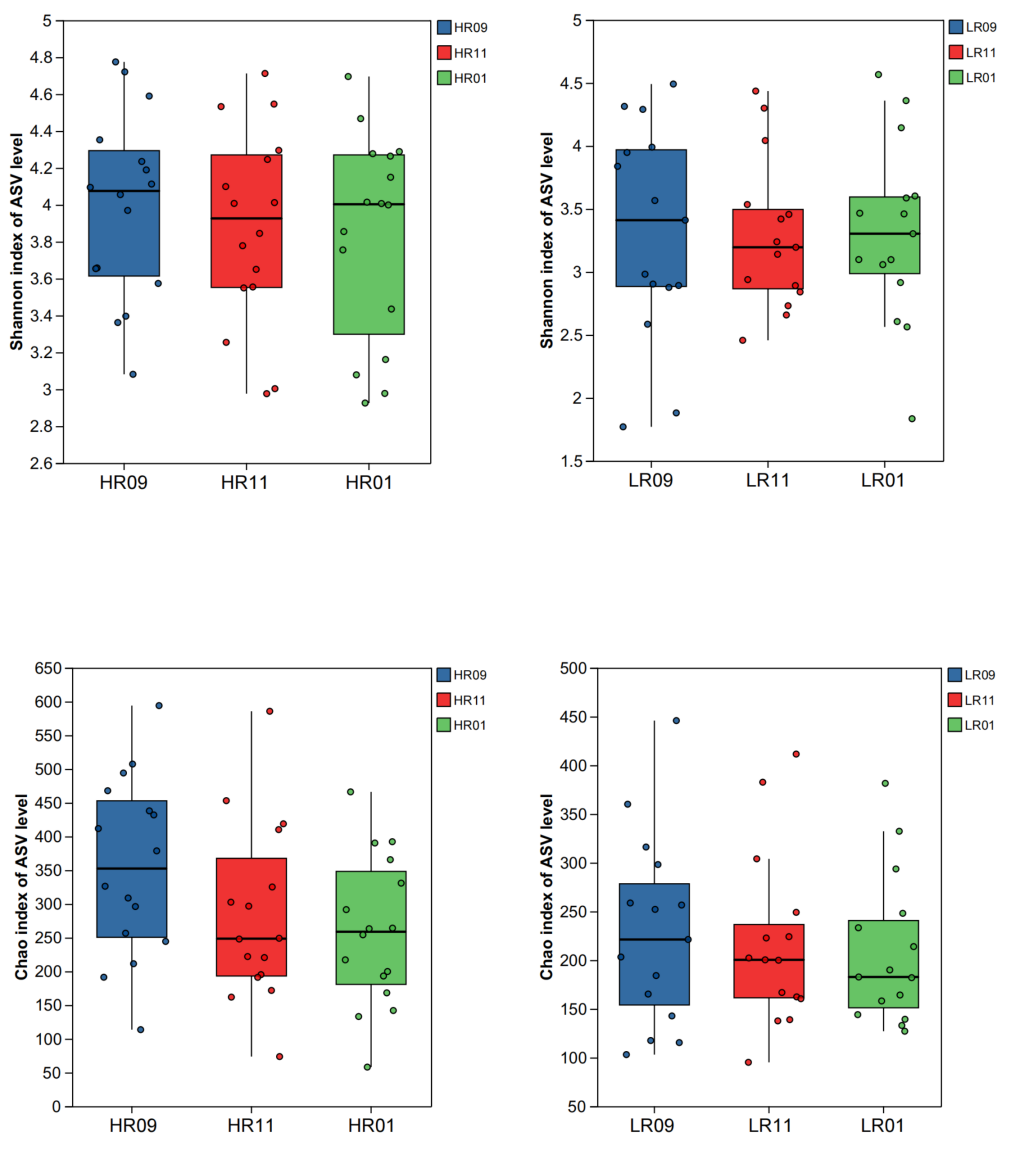


B

A

sFig1. Changes in Gut Microbiota Alpha Diversity After the Cold Wave. A: Shannon index reflects changes in diversity and evenness; B: Chao index reflects species richness.


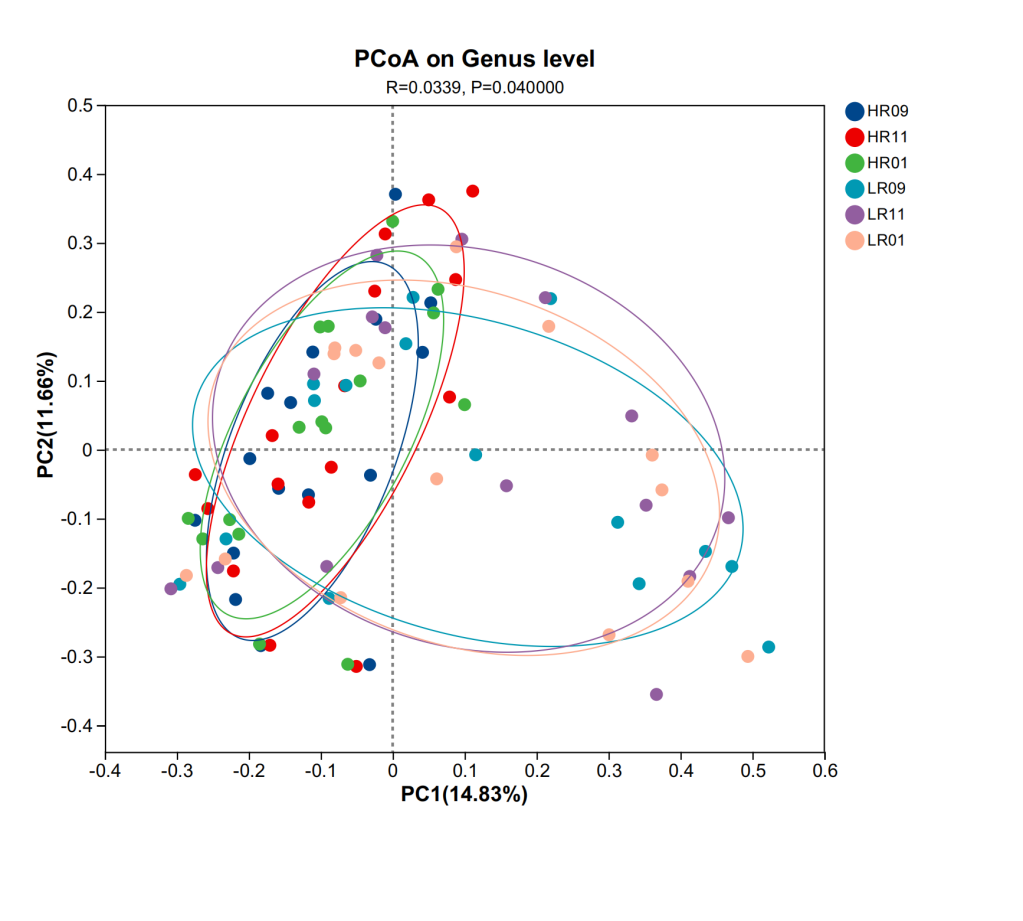


sFig2. Principal coordinate analysis (PCoA) plot based on the Bray‒Curtis distance matrix depicting patterns of beta diversity from the gut microbial communities at the Genus level.


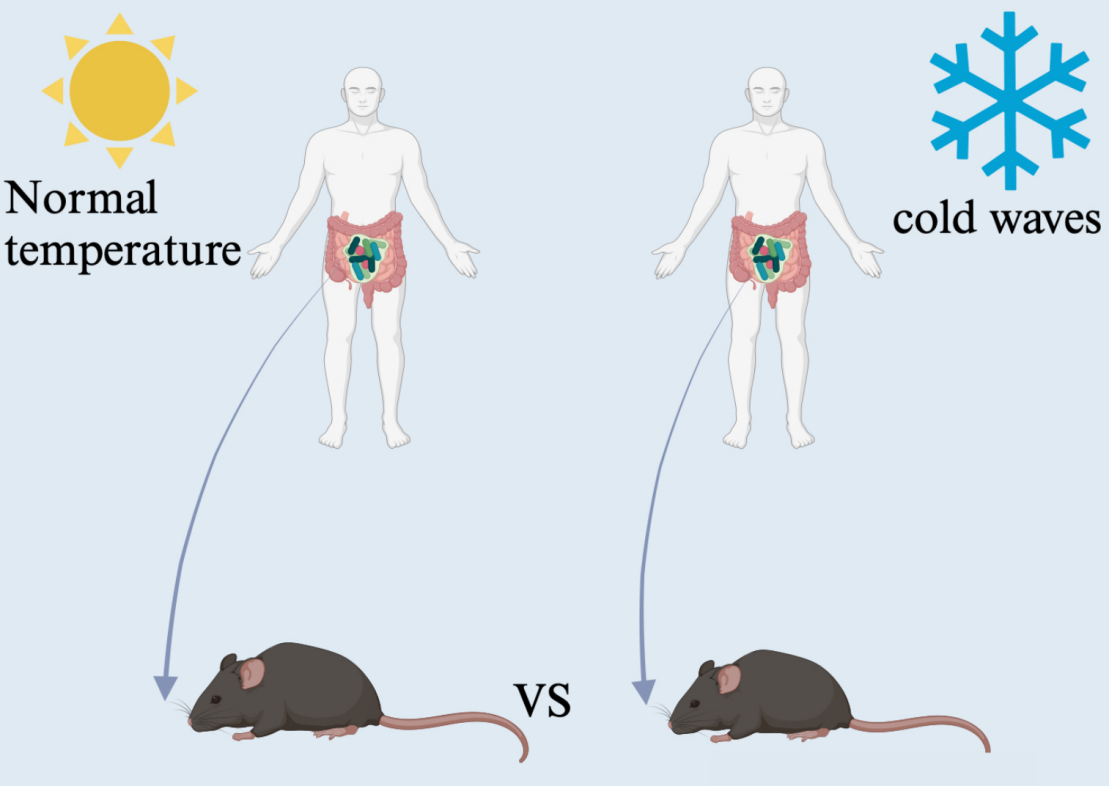


sFig3. Flowchart of fecal bacteria transplantation
